# Supplementary material for: UBXN3B positively regulates STING-mediated antiviral immune responses
Source: PubMed Central journal article supplement (PMC5998066; doi:10.1038/s41467-018-04759-8), 2018-06-13
Supplement: 41467_2018_4759_MOESM3_ESM.pdf [file 41467_2018_4759_MOESM3_ESM.pdf]

## Description of Additional Supplementary Files

File Name: Supplementary Movie 1

Description: This video depicts the neurological symptoms of *Ubxn3b*<sup>+/+</sup> and *Ubxn3b*<sup>-/-</sup> mice 3 days after HSV-1 infection.
